# Supplementary material for: Effects of RIPC on the Metabolome in Patients Undergoing Vascular Surgery: A Randomized Controlled Trial
Source: MDPI journal article supplement (doi:10.3390/biom12091312), 2022-09-16
Supplement: s1 [file s1]

**Table S1.** Baseline comparison of the analyzed metabolites between the groups

| Metabolite    | Group           |           |        |                 |           |        | <i>p</i> -value |
|---------------|-----------------|-----------|--------|-----------------|-----------|--------|-----------------|
|               | Sham            |           |        | RIPC            |           |        |                 |
|               | Mean/<br>Median | SD/<br>Q1 | Q3     | Mean/<br>median | SD/<br>Q1 | Q3     |                 |
| Ala           | 392.47          | 91.42     |        | 385.53          | 89.88     |        | 0.715           |
| Arg           | 114.26          | 29.25     |        | 120.41          | 35.37     |        | 0.365           |
| Cit           | 35.85           | 8.24      |        | 34.20           | 9.77      |        | 0.384           |
| Gln           | 811.96          | 132.49    |        | 836.51          | 186.13    |        | 0.470           |
| Glu*          | 72.90           | 55.40     | 95.90  | 57.10           | 46.40     | 74.80  | 0.036           |
| Gly*          | 240.00          | 189.00    | 286.00 | 247.00          | 202.00    | 288.00 | 0.885           |
| His           | 91.83           | 19.36     |        | 94.65           | 18.72     |        | 0.479           |
| Ile*          | 85.00           | 72.80     | 103.00 | 85.50           | 70.60     | 108.00 | 0.867           |
| Leu*          | 180.00          | 147.00    | 203.00 | 168.00          | 144.00    | 205.00 | 0.680           |
| Lys           | 251.85          | 62.25     |        | 271.04          | 70.97     |        | 0.171           |
| Met           | 22.98           | 5.60      |        | 24.48           | 6.39      |        | 0.232           |
| Orn           | 96.26           | 25.91     |        | 97.40           | 23.49     |        | 0.826           |
| Phe*          | 70.50           | 63.70     | 83.30  | 72.10           | 65.80     | 78.30  | 0.697           |
| Pro           | 204.74          | 49.65     |        | 206.58          | 63.30     |        | 0.877           |
| Ser           | 134.02          | 34.93     |        | 133.09          | 31.36     |        | 0.893           |
| Thr*          | 147.00          | 109.00    | 251.00 | 111.00          | 92.45     | 161.00 | 0.072           |
| Trp*          | 64.90           | 54.30     | 76.40  | 66.00           | 53.90     | 74.40  | 0.885           |
| Tyr           | 64.45           | 12.72     |        | 70.94           | 15.07     |        | 0.028           |
| Val           | 266.49          | 53.09     |        | 265.51          | 71.65     |        | 0.941           |
| ADMA          | 0.56            | 0.15      |        | 0.55            | 0.14      |        | 0.741           |
| Creatinine*   | 105.00          | 81.30     | 151.00 | 108.00          | 76.40     | 143.00 | 0.640           |
| Kynurenine*   | 0.04            | 0.03      | 0.05   | 0.04            | 0.03      | 0.05   | 0.353           |
| Serotonine*   | 0.43            | 0.33      | 0.62   | 0.51            | 0.34      | 0.66   | 0.421           |
| Spermine*     | 0.00            | 0.00      | 3.84   | 0.00            | 0.00      | 3.84   | 0.711           |
| Taurine       | 107.03          | 29.92     |        | 105.62          | 32.00     |        | 0.827           |
| Total DMA     | 1.12            | 0.29      |        | 1.06            | 0.29      |        | 0.330           |
| lysoPCaC16:0* | 117.00          | 78.00     | 238.00 | 104.00          | 77.30     | 235.00 | 0.895           |
| lysoPCaC16:1* | 3.49            | 2.35      | 6.29   | 3.29            | 2.44      | 6.29   | 0.935           |
| lysoPCaC17:0* | 2.11            | 1.40      | 3.99   | 1.85            | 1.22      | 4.47   | 0.678           |
| lysoPCaC18:0  | 22.52           | 7.14      |        | 22.74           | 7.34      |        | 0.881           |
| lysoPCaC18:1* | 25.00           | 19.00     | 44.40  | 26.45           | 17.00     | 41.70  | 0.696           |
| lysoPCaC18:2* | 35.80           | 21.70     | 50.00  | 39.30           | 20.70     | 57.80  | 0.551           |
| lysoPCaC20:3* | 2.21            | 1.62      | 3.43   | 2.03            | 1.52      | 4.51   | 0.854           |
| lysoPCaC20:4* | 7.29            | 5.44      | 13.10  | 6.73            | 4.55      | 12.80  | 0.501           |
| lysoPCaC26:1  | 0.63            | 0.40      |        | 0.74            | 0.57      |        | 0.360           |
| PCaaC28:1*    | 2.59            | 2.12      | 3.05   | 2.77            | 2.05      | 3.26   | 0.618           |
| PCaaC30:0*    | 3.04            | 2.51      | 4.01   | 3.03            | 2.78      | 3.69   | 0.864           |
| PCaaC32:0*    | 11.00           | 7.98      | 15.30  | 12.30           | 7.36      | 17.10  | 0.806           |
| PCaaC32:1*    | 13.60           | 8.05      | 21.10  | 13.60           | 9.15      | 22.20  | 0.815           |
| PCaaC32:2     | 2.38            | 1.59      |        | 2.26            | 1.46      |        | 0.715           |
| PCaaC32:3*    | 0.36            | 0.22      | 0.50   | 0.31            | 0.24      | 0.47   | 0.641           |
| PCaaC34:1*    | 242.00          | 209.00    | 314.00 | 262.00          | 211.00    | 317.00 | 0.953           |
| PCaaC34:2     | 338.43          | 129.76    |        | 345.13          | 129.30    |        | 0.805           |
| PCaaC34:4*    | 0.98            | 0.48      | 1.58   | 0.81            | 0.51      | 1.25   | 0.614           |

|              |        |       |        |        |       |        |       |
|--------------|--------|-------|--------|--------|-------|--------|-------|
| PCaaC36:0*   | 2.21   | 1.65  | 2.77   | 1.99   | 1.52  | 2.70   | 0.268 |
| PCaaC36:1    | 37.71  | 15.26 |        | 40.66  | 17.02 |        | 0.383 |
| PCaaC36:2    | 188.63 | 60.04 |        | 196.90 | 62.22 |        | 0.518 |
| PCaaC36:3    | 102.03 | 39.23 |        | 103.89 | 35.60 |        | 0.812 |
| PCaaC36:4    | 165.60 | 64.69 |        | 160.29 | 60.36 |        | 0.685 |
| PCaaC36:5*   | 27.80  | 16.60 | 39.80  | 22.95  | 16.85 | 36.85  | 0.800 |
| PCaaC38:0    | 2.75   | 0.93  |        | 2.48   | 0.66  |        | 0.119 |
| PCaaC38:3    | 39.95  | 13.38 |        | 40.40  | 12.81 |        | 0.869 |
| PCaaC38:4*   | 90.80  | 66.90 | 107.00 | 81.60  | 66.50 | 119.00 | 0.885 |
| PCaaC38:5    | 48.49  | 17.49 |        | 47.08  | 14.83 |        | 0.677 |
| PCaaC38:6*   | 79.20  | 61.50 | 108.00 | 76.20  | 66.50 | 98.60  | 0.700 |
| PCaaC40:4    | 2.56   | 0.65  |        | 2.66   | 0.83  |        | 0.540 |
| PCaaC40:5    | 7.75   | 2.42  |        | 7.89   | 2.57  |        | 0.780 |
| PCaaC40:6*   | 28.90  | 22.80 | 38.20  | 30.90  | 24.20 | 36.80  | 0.994 |
| PCaaC42:4    | 0.17   | 0.04  |        | 0.16   | 0.04  |        | 0.267 |
| PCaaC42:5    | 0.34   | 0.10  |        | 0.32   | 0.08  |        | 0.299 |
| PCaaC42:6    | 0.53   | 0.17  |        | 0.58   | 0.15  |        | 0.221 |
| PCaeC30:1*   | 0.45   | 0.32  | 0.57   | 0.37   | 0.26  | 0.65   | 0.737 |
| PCaeC32:1*   | 1.93   | 1.54  | 2.94   | 2.03   | 1.44  | 2.93   | 0.861 |
| PCaeC32:2*   | 0.56   | 0.44  | 0.77   | 0.59   | 0.43  | 0.75   | 1.000 |
| PCaeC34:0*   | 1.06   | 0.85  | 1.46   | 1.04   | 0.87  | 1.36   | 0.978 |
| PCaeC34:1    | 8.04   | 3.12  |        | 7.96   | 3.35  |        | 0.909 |
| PCaeC34:2    | 7.21   | 2.93  |        | 7.23   | 2.97  |        | 0.979 |
| PCaeC34:3*   | 3.73   | 2.64  | 5.44   | 3.65   | 2.31  | 5.91   | 0.815 |
| PCaeC36:0    | 0.85   | 0.25  |        | 0.85   | 0.31  |        | 0.978 |
| PCaeC36:1    | 6.76   | 2.52  |        | 6.56   | 2.32  |        | 0.701 |
| PCaeC36:2    | 10.20  | 3.49  |        | 10.02  | 3.50  |        | 0.811 |
| PCaeC36:3*   | 4.56   | 3.70  | 6.34   | 4.62   | 3.68  | 6.55   | 0.885 |
| PCaeC36:4*   | 11.20  | 8.05  | 14.00  | 9.77   | 7.91  | 13.60  | 0.441 |
| PCaeC36:5*   | 7.47   | 6.29  | 10.50  | 7.21   | 5.46  | 10.60  | 0.419 |
| PCaeC38:0    | 1.74   | 0.71  |        | 1.68   | 0.59  |        | 0.650 |
| PCaeC38:3    | 3.23   | 0.96  |        | 3.14   | 0.90  |        | 0.655 |
| PCaeC38:4    | 9.51   | 2.43  |        | 9.03   | 2.02  |        | 0.316 |
| PCaeC38:5    | 13.05  | 3.13  |        | 12.34  | 3.68  |        | 0.323 |
| PCaeC38:6*   | 5.59   | 4.43  | 7.46   | 5.19   | 4.20  | 7.32   | 0.349 |
| PCaeC40:1    | 1.23   | 0.35  |        | 1.33   | 0.42  |        | 0.268 |
| PCaeC40:2*   | 1.70   | 1.44  | 1.93   | 1.59   | 1.43  | 1.97   | 0.584 |
| PCaeC40:4*   | 1.86   | 1.61  | 2.22   | 1.65   | 1.52  | 1.97   | 0.104 |
| PCaeC40:5    | 2.86   | 0.62  |        | 2.66   | 0.55  |        | 0.114 |
| PCaeC40:6*   | 4.05   | 3.45  | 4.91   | 3.79   | 3.34  | 4.36   | 0.222 |
| PCaeC42:4    | 0.70   | 0.19  |        | 0.67   | 0.19  |        | 0.483 |
| PCaeC44:4*   | 0.40   | 0.30  | 0.46   | 0.32   | 0.26  | 0.45   | 0.649 |
| PCaeC44:5*   | 1.37   | 1.06  | 1.80   | 1.29   | 1.09  | 1.66   | 0.499 |
| PCaeC44:6    | 0.99   | 0.40  |        | 0.89   | 0.23  |        | 0.174 |
| SM(OH)C14:1* | 3.22   | 2.28  | 5.14   | 2.96   | 2.30  | 4.93   | 0.779 |
| SM(OH)C16:1* | 1.74   | 1.14  | 2.60   | 1.53   | 1.16  | 2.62   | 0.750 |
| SM(OH)C22:1* | 6.01   | 4.69  | 8.60   | 6.40   | 4.89  | 7.72   | 0.755 |
| SM(OH)C22:2* | 5.38   | 4.33  | 6.94   | 5.05   | 4.22  | 6.98   | 0.686 |
| SM(OH)C24:1  | 0.70   | 0.29  |        | 0.69   | 0.19  |        | 0.744 |
| SMC16:0*     | 66.50  | 41.80 | 94.00  | 71.00  | 36.70 | 90.90  | 0.594 |

|                                   |         |         |         |         |         |         |       |
|-----------------------------------|---------|---------|---------|---------|---------|---------|-------|
| <b>SMC16:1*</b>                   | 8.80    | 6.51    | 12.70   | 8.87    | 5.83    | 12.50   | 0.573 |
| <b>SMC18:0*</b>                   | 21.50   | 16.00   | 31.70   | 21.70   | 16.40   | 26.60   | 0.950 |
| <b>SMC18:1*</b>                   | 5.71    | 4.28    | 8.82    | 6.13    | 3.65    | 8.56    | 0.610 |
| <b>SMC20:2*</b>                   | 0.18    | 0.12    | 0.29    | 0.18    | 0.12    | 0.21    | 0.559 |
| <b>SMC24:0</b>                    | 11.17   | 4.21    |         | 11.18   | 3.54    |         | 0.993 |
| <b>SMC24:1</b>                    | 34.55   | 9.76    |         | 33.01   | 8.85    |         | 0.431 |
| <b>SMC26:0*</b>                   | 0.09    | 0.08    | 0.14    | 0.10    | 0.08    | 0.13    | 0.667 |
| <b>SMC26:1</b>                    | 0.30    | 0.11    |         | 0.31    | 0.11    |         | 0.841 |
| <b>H1*</b>                        | 4825.00 | 4245.00 | 5231.00 | 4505.00 | 4207.00 | 5013.00 | 0.128 |
| <b>(C2+C3)/C0</b>                 | 0.24    | 0.08    |         | 0.21    | 0.06    |         | 0.105 |
| <b>AAA</b>                        | 204.23  | 35.65   |         | 211.71  | 36.80   |         | 0.325 |
| <b>ADMA/Arg*</b>                  | 0.01    | 0.00    | 0.01    | 0.01    | 0.00    | 0.01    | 0.841 |
| <b>BCAA</b>                       | 532.19  | 96.74   |         | 537.89  | 143.34  |         | 0.825 |
| <b>C2/C0*</b>                     | 0.18    | 0.16    | 0.24    | 0.18    | 0.15    | 0.22    | 0.320 |
| <b>Cit/Arg</b>                    | 0.34    | 0.12    |         | 0.31    | 0.13    |         | 0.276 |
| <b>Cit/Orn</b>                    | 0.39    | 0.11    |         | 0.37    | 0.12    |         | 0.342 |
| <b>Essential AA</b>               | 1087.47 | 208.40  |         | 1081.53 | 212.42  |         | 0.893 |
| <b>Fisher ratio</b>               | 2.64    | 0.44    |         | 2.54    | 0.50    |         | 0.326 |
| <b>Glucogenic AA*</b>             | 740.00  | 690.00  | 872.00  | 765.00  | 701.00  | 839.00  | 0.770 |
| <b>Kynurenine/Trp</b>             | 0.04    | 0.02    |         | 0.04    | 0.01    |         | 0.654 |
| <b>Nonessential AA</b>            | 2319.57 | 252.78  |         | 2346.04 | 338.07  |         | 0.671 |
| <b>Orn/Arg*</b>                   | 0.78    | 0.66    | 1.06    | 0.83    | 0.66    | 1.02    | 0.741 |
| <b>Putrescine/Orn*</b>            | 0.00    | 0.00    | 0.00    | 0.00    | 0.00    | 0.00    | 0.595 |
| <b>Serotonin/Trp*</b>             | 0.01    | 0.01    | 0.01    | 0.01    | 0.01    | 0.01    | 0.391 |
| <b>Total SM</b>                   | 180.96  | 59.56   |         | 169.40  | 49.07   |         | 0.346 |
| <b>Total SM-nonOH</b>             | 158.61  | 53.58   |         | 148.05  | 44.12   |         | 0.326 |
| <b>Total SM-OH*</b>               | 17.40   | 13.30   | 23.80   | 15.80   | 13.40   | 23.70   | 0.898 |
| <b>Total SM-OH/Total SM-nonOH</b> | 0.12    | 0.03    |         | 0.12    | 0.02    |         | 0.542 |
| <b>Tyr/Phe</b>                    | 0.91    | 0.20    |         | 0.98    | 0.21    |         | 0.115 |

All metabolites are measured in  $\mu\text{mol/L}$ , except for metabolic ratios, which do not have a unit

\* Non-normal distribution (Kolmogorov-Smirnov's test). In the case of a non-normal distribution, median and quartiles (Q1, Q3) are provided. In the case of a normal distribution, mean and standard deviation (SD) are given. SD - standard deviation, Q1 - first quartile, Q3 - third quartile, Ala - Alanine, Arg - Arginine, Cit - Citrulline, Gln - Glutamine, Glu - Glutamic acid, Gly - Glycine, His - Histidine, Ile - Isoleucine, Leu - Leucine, Lys - Lysine, Met - Methionine, Orn - Ornithine, Phe - Phenylalanine, Pro - Proline, Ser - Serine, Thr - Threonine, Trp - Tryptophan, Tyr - Tyrosine, Val - Valine, ADMA - Asymmetric dimethylarginine, DMA - dimethylarginine, lysoPCa - lysoPhosphatidylcholine acyl, PCaa - Phosphatidylcholine diacyl, PCae - Phosphatidylcholine acyl-alkyl, SM(OH) - Hydroxysphingomyeline, SM - Sphingomyeline, H1 - hexose, C2 - Acetylcarnitine, C3 - Propionylcarnitine, C0 - Carnitine, AAA - Amino adipic acid, ADMA - asymmetric dimethylarginine, BCAA - Branched chain amino acids, AA - Amino acids, OH - hydroxy, nonOH - Nonhydroxy
