# Supplementary material for: Effects of RIPC on the Metabolome in Patients Undergoing Vascular Surgery: A Randomized Controlled Trial
Source: MDPI journal article supplement (doi:10.3390/biom12091312), 2022-09-16
Supplement: s1 [file s1]

**Table S2.** Change in the metabolites 24 h after operation, comparison between the groups

| Metabolite    | Group           |           |        |                 |           |        | p-value |
|---------------|-----------------|-----------|--------|-----------------|-----------|--------|---------|
|               | Sham            |           |        | RIPC            |           |        |         |
|               | Mean/<br>median | SD/<br>Q1 | Q3     | Mean/<br>median | SD/<br>Q1 | Q3     |         |
| Ala           | -25.26          | 120.74    |        | -11.56          | 123.72    |        | 0.592   |
| Arg*          | -20.00          | -38.70    | -4.20  | -21.00          | -35.80    | -2.00  | 0.591   |
| Cit           | -8.83           | 8.94      |        | -7.63           | 7.77      |        | 0.496   |
| Gln           | -150.49         | 169.93    |        | -161.47         | 189.39    |        | 0.770   |
| Glu*          | -0.70           | -15.50    | 14.60  | -12.70          | -24.00    | 14.00  | 0.128   |
| Gly           | -26.32          | 53.43     |        | -22.38          | 52.73     |        | 0.723   |
| His           | -12.69          | 13.42     |        | -14.72          | 18.57     |        | 0.550   |
| Ile           | -16.43          | 28.88     |        | -24.95          | 32.72     |        | 0.188   |
| Leu           | -28.18          | 54.57     |        | -46.08          | 52.25     |        | 0.112   |
| Lys           | -50.32          | 65.53     |        | -56.52          | 63.24     |        | 0.645   |
| Met           | -1.63           | 7.26      |        | -1.23           | 9.58      |        | 0.822   |
| Orn           | -25.24          | 30.58     |        | -26.01          | 24.84     |        | 0.894   |
| Phe           | 2.21            | 12.68     |        | -1.08           | 14.84     |        | 0.255   |
| Pro*          | -13.00          | -55.00    | 26.00  | -17.00          | -42.00    | 21.00  | 0.666   |
| Ser*          | -27.10          | -37.90    | -14.00 | -32.00          | -53.80    | -10.00 | 0.222   |
| Thr*          | -21.60          | -49.05    | 18.00  | -20.90          | -81.00    | 12.00  | 0.516   |
| Trp           | -8.81           | 17.38     |        | -10.01          | 15.16     |        | 0.725   |
| Tyr           | -3.87           | 16.12     |        | -5.33           | 18.89     |        | 0.692   |
| Val           | -22.24          | 74.64     |        | -37.78          | 72.87     |        | 0.315   |
| ADMA          | -0.09           | 0.18      |        | -0.08           | 0.18      |        | 0.833   |
| Creatinine*   | 1.00            | -9.00     | 20.00  | -3.70           | -15.00    | 22.00  | 0.322   |
| Kynurenine    | 0.06            | 0.74      |        | 0.09            | 0.97      |        | 0.842   |
| Serotonine    | -0.06           | 0.13      |        | -0.07           | 0.15      |        | 0.717   |
| Spermine*     | 0.00            | 0.00      | 0.00   | 0.00            | 0.00      | 0.00   | 0.030   |
| Taurine       | -14.88          | 30.13     |        | -10.28          | 31.39     |        | 0.475   |
| Total DMA     | -0.08           | 0.34      |        | -0.09           | 0.37      |        | 0.932   |
| lysoPCaC16:0* | -41.30          | -96.00    | -25.40 | -43.00          | -99.00    | -26.80 | 0.643   |
| lysoPCaC16:1* | -1.12           | -2.03     | -0.66  | -1.20           | -3.30     | -0.65  | 0.309   |
| lysoPCaC17:0* | -0.81           | -1.84     | -0.38  | -0.93           | -2.06     | -0.46  | 0.376   |
| lysoPCaC18:0* | -9.90           | -13.68    | -7.28  | -9.96           | -16.07    | -6.00  | 0.873   |
| lysoPCaC18:1* | -12.18          | -19.25    | -5.69  | -11.80          | -25.20    | -7.93  | 0.717   |
| lysoPCaC18:2* | -21.00          | -34.10    | -5.90  | -15.00          | -32.20    | -6.40  | 0.833   |
| lysoPCaC20:3* | -0.94           | -1.94     | -0.62  | -0.96           | -1.61     | -0.53  | 0.885   |
| lysoPCaC20:4* | -2.41           | -4.50     | -1.10  | -2.82           | -5.54     | -1.56  | 0.513   |
| lysoPCaC26:1* | -0.05           | -0.14     | 0.08   | -0.03           | -0.12     | 0.06   | 0.670   |
| PCaaC28:1*    | -0.46           | -0.81     | -0.07  | -0.36           | -0.71     | -0.08  | 0.399   |
| PCaaC30:0*    | -0.77           | -1.27     | -0.26  | -0.69           | -1.04     | -0.40  | 0.791   |
| PCaaC32:0     | -1.17           | 2.81      |        | -1.68           | 1.94      |        | 0.321   |
| PCaaC32:1*    | -1.90           | -4.40     | -0.22  | -1.80           | -5.53     | -0.16  | 0.938   |
| PCaaC32:2*    | -0.46           | -1.20     | -0.16  | -0.63           | -1.13     | -0.26  | 0.483   |
| PCaaC32:3*    | -0.06           | -0.09     | -0.01  | -0.05           | -0.08     | 0.00   | 0.840   |
| PCaaC34:1     | -26.40          | 58.84     |        | -33.38          | 47.97     |        | 0.536   |
| PCaaC34:2     | -39.81          | 75.21     |        | -45.71          | 50.00     |        | 0.657   |
| PCaaC34:4*    | -0.24           | -0.36     | -0.11  | -0.23           | -0.54     | -0.10  | 0.536   |

|              |        |        |        |        |        |       |       |
|--------------|--------|--------|--------|--------|--------|-------|-------|
| PCaaC36:0    | -0.47  | 0.54   |        | -0.48  | 0.40   |       | 0.956 |
| PCaaC36:1*   | -7.20  | -13.50 | -4.70  | -5.90  | -12.10 | -2.90 | 0.264 |
| PCaaC36:2    | -39.09 | 37.01  |        | -44.61 | 29.63  |       | 0.433 |
| PCaaC36:3*   | -20.40 | -29.00 | -12.00 | -16.00 | -29.00 | -3.30 | 0.240 |
| PCaaC36:4    | -15.06 | 42.18  |        | -20.88 | 25.73  |       | 0.425 |
| PCaaC36:5*   | -4.30  | -7.45  | -1.85  | -2.35  | -11.20 | -0.34 | 0.335 |
| PCaaC38:0*   | -0.47  | -0.74  | -0.26  | -0.39  | -0.84  | -0.12 | 0.489 |
| PCaaC38:3    | -8.33  | 8.60   |        | -9.88  | 7.56   |       | 0.363 |
| PCaaC38:4    | -12.55 | 19.84  |        | -17.05 | 12.61  |       | 0.196 |
| PCaaC38:5    | -8.79  | 11.96  |        | -9.94  | 7.83   |       | 0.585 |
| PCaaC38:6*   | -11.80 | -17.70 | -3.00  | -7.30  | -18.50 | 2.60  | 0.126 |
| PCaaC40:4    | -0.49  | 0.53   |        | -0.66  | 0.56   |       | 0.139 |
| PCaaC40:5    | -1.47  | 1.66   |        | -1.79  | 1.38   |       | 0.322 |
| PCaaC40:6*   | -5.30  | -8.40  | -2.20  | -3.80  | -7.00  | -0.60 | 0.264 |
| PCaaC42:4    | -0.03  | 0.04   |        | -0.02  | 0.04   |       | 0.315 |
| PCaaC42:5    | -0.07  | 0.08   |        | -0.06  | 0.07   |       | 0.612 |
| PCaaC42:6*   | -0.12  | -0.17  | -0.03  | -0.08  | -0.15  | 0.00  | 0.233 |
| PCaeC30:1*   | 0.03   | -0.16  | 0.13   | 0.01   | -0.13  | 0.10  | 0.893 |
| PCaeC32:1    | -0.39  | 0.48   |        | -0.42  | 0.33   |       | 0.722 |
| PCaeC32:2*   | -0.09  | -0.18  | -0.04  | -0.08  | -0.14  | -0.03 | 0.643 |
| PCaeC34:0    | -0.24  | 0.21   |        | -0.23  | 0.22   |       | 0.741 |
| PCaeC34:1    | -1.38  | 1.65   |        | -1.36  | 1.46   |       | 0.944 |
| PCaeC34:2    | -1.86  | 1.27   |        | -1.91  | 1.42   |       | 0.850 |
| PCaeC34:3    | -1.22  | 0.89   |        | -1.31  | 1.09   |       | 0.641 |
| PCaeC36:0    | -0.07  | 0.18   |        | -0.11  | 0.17   |       | 0.360 |
| PCaeC36:1*   | -0.86  | -1.40  | -0.46  | -0.68  | -1.96  | -0.26 | 0.904 |
| PCaeC36:2*   | -1.70  | -2.89  | -1.03  | -1.60  | -2.59  | -0.79 | 0.646 |
| PCaeC36:3*   | -1.29  | -1.96  | -0.80  | -1.15  | -1.72  | -0.57 | 0.559 |
| PCaeC36:4    | -2.32  | 1.92   |        | -2.63  | 1.99   |       | 0.450 |
| PCaeC36:5    | -1.79  | 1.55   |        | -1.96  | 1.51   |       | 0.597 |
| PCaeC38:0*   | -0.41  | -0.58  | -0.17  | -0.35  | -0.70  | -0.13 | 0.632 |
| PCaeC38:3    | -0.54  | 0.66   |        | -0.61  | 0.61   |       | 0.605 |
| PCaeC38:4    | -1.46  | 1.81   |        | -1.79  | 1.17   |       | 0.297 |
| PCaeC38:5    | -2.39  | 2.34   |        | -2.74  | 1.89   |       | 0.444 |
| PCaeC38:6    | -1.28  | 1.16   |        | -1.33  | 0.83   |       | 0.787 |
| PCaeC40:1    | -0.27  | 0.24   |        | -0.31  | 0.36   |       | 0.546 |
| PCaeC40:2    | -0.26  | 0.35   |        | -0.33  | 0.27   |       | 0.308 |
| PCaeC40:4*   | -0.30  | -0.44  | -0.20  | -0.25  | -0.57  | 0.02  | 0.365 |
| PCaeC40:5    | -0.42  | 0.52   |        | -0.47  | 0.36   |       | 0.636 |
| PCaeC40:6    | -0.69  | 0.84   |        | -0.82  | 0.57   |       | 0.377 |
| PCaeC42:4    | -0.11  | 0.15   |        | -0.15  | 0.15   |       | 0.252 |
| PCaeC44:4    | -0.05  | 0.09   |        | -0.07  | 0.13   |       | 0.490 |
| PCaeC44:5*   | -0.21  | -0.28  | -0.10  | -0.21  | -0.34  | -0.02 | 0.957 |
| PCaeC44:6*   | -0.16  | -0.24  | -0.07  | -0.12  | -0.25  | -0.03 | 0.264 |
| SM(OH)C14:1* | -0.57  | -1.05  | -0.26  | -0.47  | -0.84  | -0.11 | 0.240 |
| SM(OH)C16:1  | -0.20  | 0.42   |        | -0.26  | 0.28   |       | 0.368 |
| SM(OH)C22:1* | -1.10  | -1.92  | -0.55  | -0.89  | -1.93  | -0.30 | 0.481 |
| SM(OH)C22:2  | -1.00  | 1.27   |        | -1.06  | 0.85   |       | 0.761 |
| SM(OH)C24:1  | -0.14  | 0.18   |        | -0.13  | 0.15   |       | 0.805 |
| SMC16:0      | -11.77 | 13.46  |        | -11.64 | 10.45  |       | 0.960 |

|                                   |         |         |        |         |         |       |       |
|-----------------------------------|---------|---------|--------|---------|---------|-------|-------|
| <b>SMC16:1</b>                    | -1.13   | 1.90    |        | -1.17   | 1.19    |       | 0.904 |
| <b>SMC18:0</b>                    | -2.81   | 4.99    |        | -3.23   | 4.60    |       | 0.680 |
| <b>SMC18:1</b>                    | -0.50   | 1.35    |        | -0.70   | 1.12    |       | 0.453 |
| <b>SMC20:2*</b>                   | -0.03   | -0.05   | 0.00   | -0.02   | -0.06   | 0.02  | 0.849 |
| <b>SMC24:0</b>                    | -2.11   | 2.25    |        | -2.52   | 1.74    |       | 0.338 |
| <b>SMC24:1</b>                    | -5.10   | 7.35    |        | -6.08   | 5.64    |       | 0.475 |
| <b>SMC26:0</b>                    | -0.01   | 0.05    |        | -0.01   | 0.05    |       | 0.901 |
| <b>SMC26:1</b>                    | -0.04   | 0.09    |        | -0.06   | 0.07    |       | 0.414 |
| <b>H1</b>                         | 1231.64 | 1798.12 |        | 1157.69 | 1431.53 |       | 0.828 |
| <b>(C2+C3)/C0</b>                 | -0.05   | 0.07    |        | -0.04   | 0.08    |       | 0.744 |
| <b>AAA</b>                        | -10.40  | 37.01   |        | -16.33  | 38.51   |       | 0.453 |
| <b>ADMA/Arg*</b>                  | 0.00    | 0.00    | 0.00   | 0.00    | 0.00    | 0.00  | 0.776 |
| <b>BCAA*</b>                      | -104.00 | -183.00 | -29.00 | -81.00  | -159.00 | 53.00 | 0.238 |
| <b>C2/C0</b>                      | -0.04   | 0.06    |        | -0.04   | 0.07    |       | 0.564 |
| <b>Cit/Arg</b>                    | -0.02   | 0.11    |        | 0.00    | 0.11    |       | 0.422 |
| <b>Cit/Orn*</b>                   | 0.04    | -0.07   | 0.09   | 0.00    | -0.12   | 0.14  | 0.474 |
| <b>Essential AA</b>               | -159.98 | 254.73  |        | -185.36 | 241.36  |       | 0.625 |
| <b>Fisher ratio</b>               | -0.24   | 0.56    |        | -0.32   | 0.56    |       | 0.456 |
| <b>Glucogenic AA</b>              | -84.81  | 162.93  |        | -57.76  | 175.56  |       | 0.445 |
| <b>Kynurenine/Trp*</b>            | 0.01    | 0.00    | 0.01   | 0.01    | 0.00    | 0.02  | 0.741 |
| <b>Nonessential AA</b>            | -339.91 | 362.31  |        | -324.04 | 413.17  |       | 0.845 |
| <b>Orn/Arg*</b>                   | -0.10   | -0.24   | 0.08   | -0.12   | -0.25   | 0.08  | 0.901 |
| <b>Putrescine/Orn*</b>            | 0.00    | 0.00    | 0.00   | 0.00    | 0.00    | 0.00  | 0.413 |
| <b>Serotonin/Trp*</b>             | 0.00    | 0.00    | 0.00   | 0.00    | 0.00    | 0.00  | 0.991 |
| <b>Total SM</b>                   | -27.53  | 34.38   |        | -30.78  | 24.52   |       | 0.624 |
| <b>Total SM-nonOH</b>             | -23.88  | 30.22   |        | -25.88  | 22.34   |       | 0.731 |
| <b>Total SM-OH</b>                | -3.09   | 3.69    |        | -3.46   | 2.72    |       | 0.583 |
| <b>Total SM-OH/Total SM-nonOH</b> | 0.00    | 0.01    |        | 0.00    | 0.01    |       | 0.578 |
| <b>Tyr/Phe</b>                    | -0.09   | 0.18    |        | -0.07   | 0.22    |       | 0.692 |

All metabolites are measured in  $\mu\text{mol/L}$ , except for metabolic ratios, which do not have a unit

\* Non-normal distribution (Kolmogorov-Smirnov's test). In the case of a non-normal distribution, median and quartiles (Q1, Q3) are provided. In the case of a normal distribution, mean and standard deviation (SD) are given. SD - standard deviation, Q1 - first quartile, Q3 - third quartile, Ala - Alanine, Arg - Arginine, Cit - Citrulline, Gln - Glutamine, Glu - Glutamic acid, Gly - Glycine, His - Histidine, Ile - Isoleucine, Leu - Leucine, Lys - Lysine, Met - Methionine, Orn - Ornithine, Phe - Phenylalanine, Pro - Proline, Ser - Serine, Thr - Threonine, Trp - Tryptophan, Tyr - Tyrosine, Val - Valine, ADMA - Asymmetric dimethylarginine, DMA - dimethylarginine, lysoPCa - lysoPhosphatidylcholine acyl, PCaa - Phosphatidylcholine diacyl, PCae - Phosphatidylcholine acyl-alkyl, SM(OH) - Hydroxysphingomyeline, SM - Sphingomyeline, H1 - hexose, C2 - Acetylcarnitine, C3 - Propionylcarnitine, C0 - Carnitine, AAA - Amino adipic acid, ADMA - asymmetric dimethylarginine, BCAA - Branched chain amino acids, AA - Amino acids, OH - hydroxy, nonOH - Nonhydroxy
